# Supplementary material for: Self-Aligned Interdigitated Transducers for Acoustofluidics
Source: Preprints.org preprint supplement (doi:10.20944/preprints201611.0086.v2), 2016-11-22
Supplement: Supplementary file 2 [file supplementary]

Archive with 7 entries (6 files):
- preprints-1029-supplementary/
- preprints-1029-supplementary/S1_TSAW Induced Droplet Streaming.tif
- preprints-1029-supplementary/S2_TSAW Induced Droplet Streaming.avi
- preprints-1029-supplementary/S3_Multiple Resonant Frequencies.tif
- preprints-1029-supplementary/S4_Microparticles Separation.avi
- preprints-1029-supplementary/S5_Droplet Generation.avi
- preprints-1029-supplementary/Supplementary information (YA,ZC,PT,AT,NTN edited).pdf
