# Supplementary figures and images for: Self-Aligned Interdigitated Transducers for Acoustofluidics
Source: Preprints.org preprint supplement (doi:10.20944/preprints201611.0086.v2), 2016-11-22

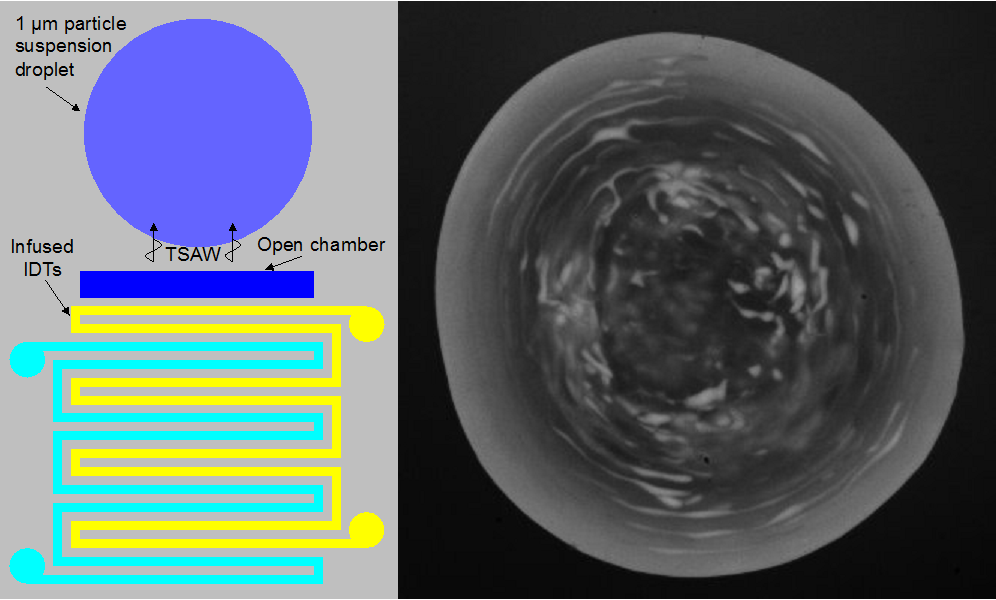

Supplement: Supplementary file 2 [file supplementary › preprints-1029-supplementary/S1_TSAW Induced Droplet Streaming.tif]

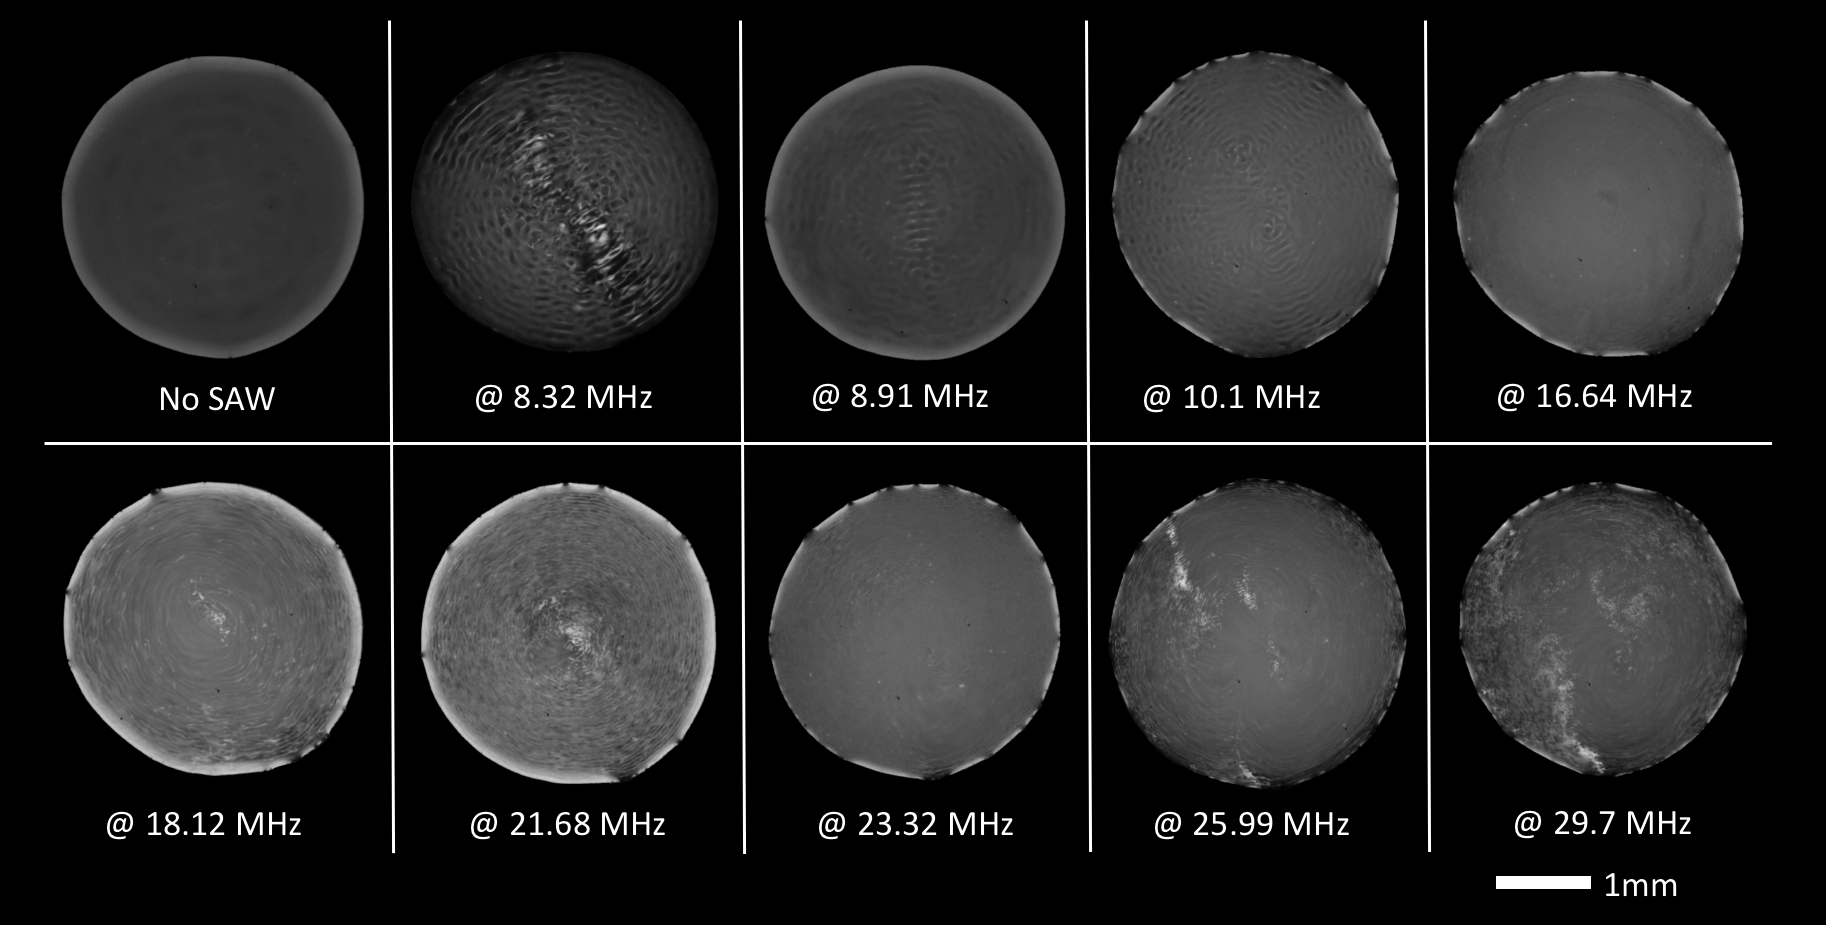

Supplement: Supplementary file 2 [file supplementary › preprints-1029-supplementary/S3_Multiple Resonant Frequencies.tif]
